# Supplementary material for: Association between vitamin D metabolites, vitamin D binding protein, and proteinuria in dogs
Source: PubMed Central journal article supplement (PMC7694856; doi:10.1111/jvim.15912), 2020-10-07

1. Diagnostic plots for multivariable regression models associated with Table 4.

A. **1,25(OH)<sub>2</sub>D**

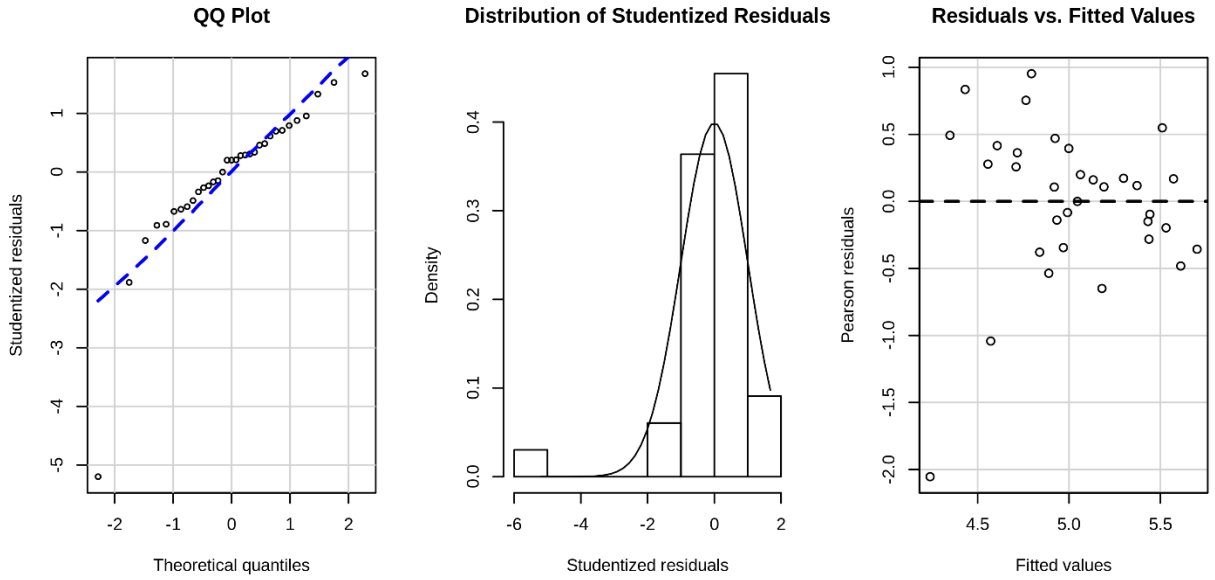

B. **24,25(OH)<sub>2</sub>D**

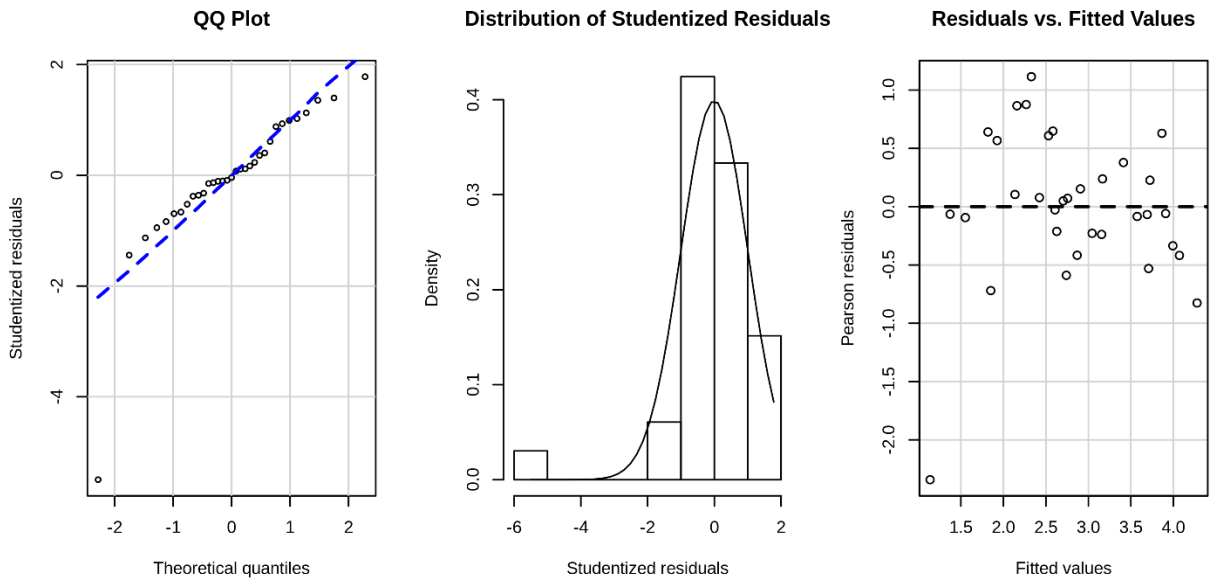

C. **25(OH)D**

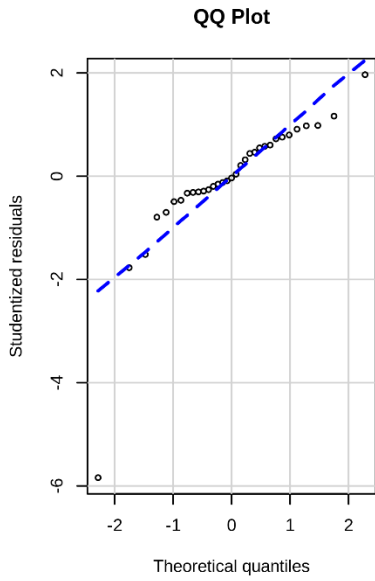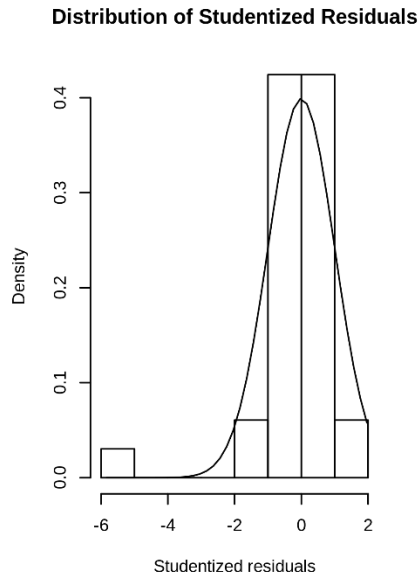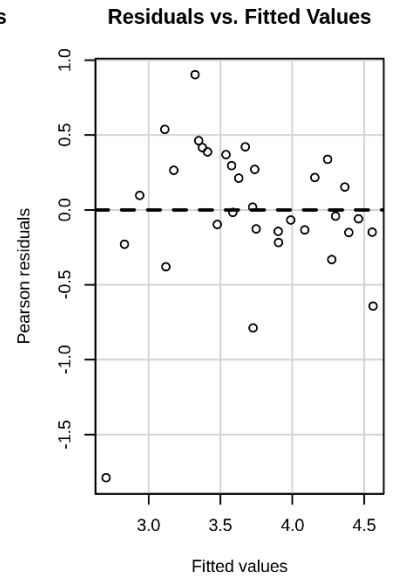

2. Diagnostic plots for multivariable regression models associated with Table 5.

**A. 1,25(OH)<sub>2</sub>D**

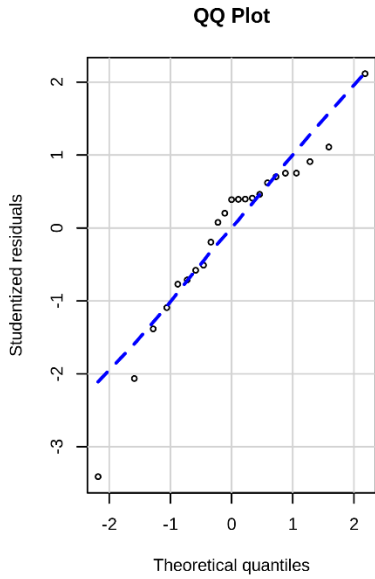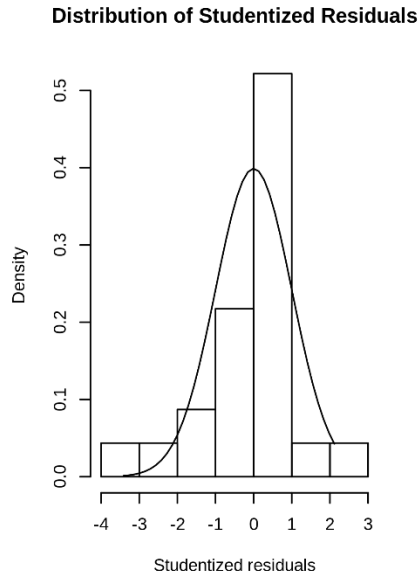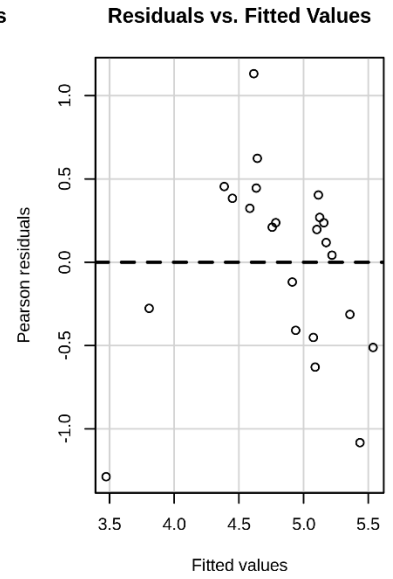

**B. 24,25(OH)<sub>2</sub>D**

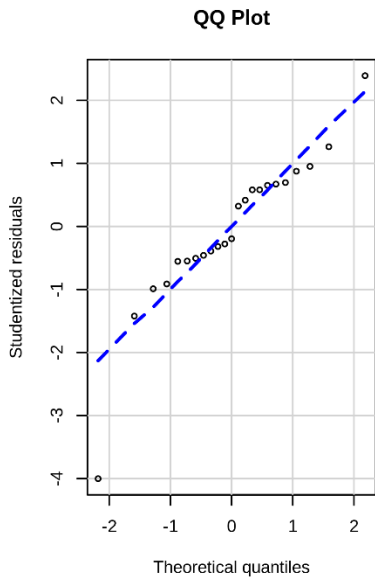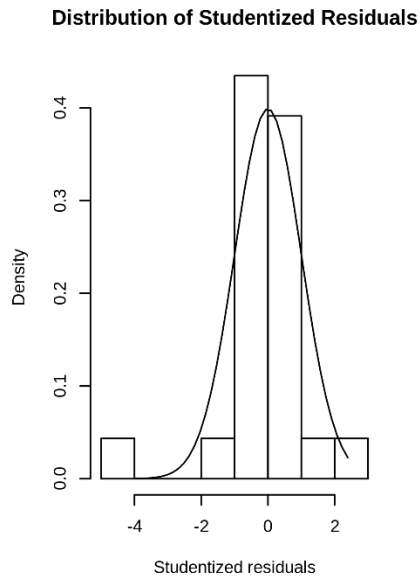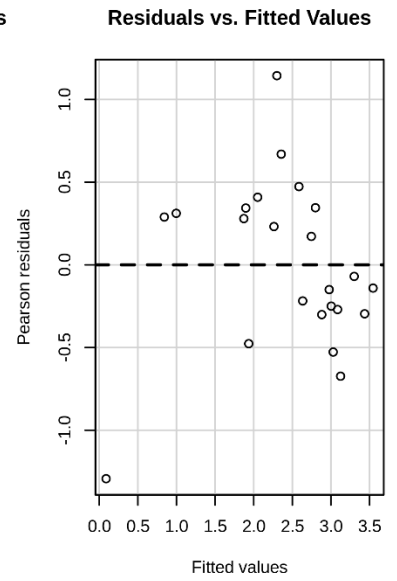

**C. 25(OH)D**

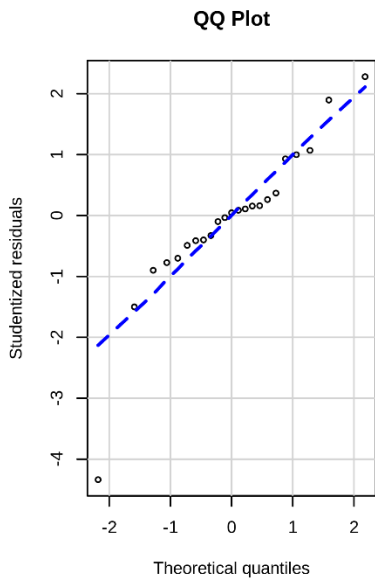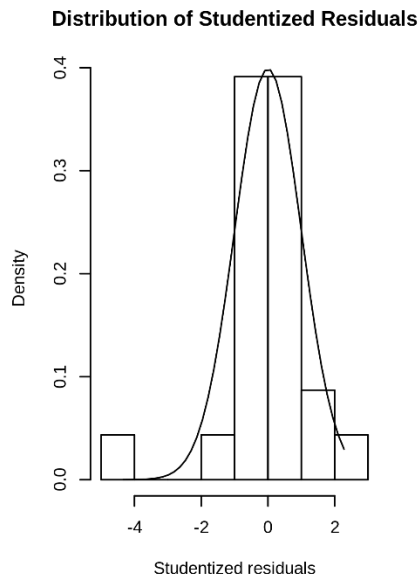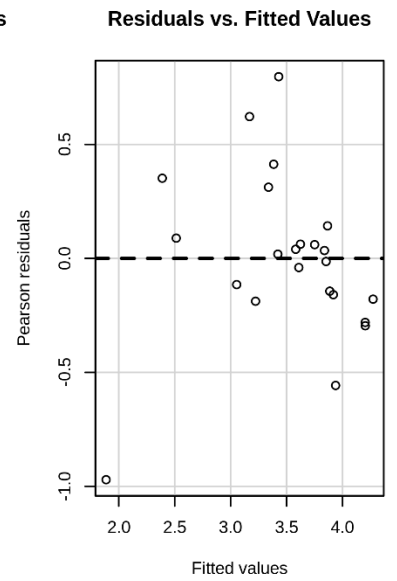

Supplement: JVIM-34-2468-s001.pdf [file JVIM-34-2468-s001.pdf]
